# Supplementary material for: Prescription Rates of Guideline‐Directed Medications Are Associated With In‐Hospital Mortality Among Japanese Patients With Acute Myocardial Infarction: A Report From JROAD‐DPC Study
Source: PubMed Central journal article supplement — J Am Heart Assoc. 2019 Mar 26;8(7):e009692. doi: 10.1161/JAHA.118.009692 (PMC6509709; doi:10.1161/jaha.118.009692), 2019-03-26
Supplement: JAH3-8-e009692-s001.pdf [file JAH3-8-e009692-s001.pdf]

# **SUPPLEMENTAL MATERIAL**

**Table S1. Baseline hospital characteristics per quantiles by prescription rate of aspirin on admission.**

|                                                  | Q1 (189 Hospitals)   | Q2 (182 Hospitals)   | Q3 (186 Hospitals)   | Q4 (186 Hospitals)   | <b>P</b> |
|--------------------------------------------------|----------------------|----------------------|----------------------|----------------------|----------|
| Age in years, mean (SD)                          | 71.26 (4.51)         | 69.19 (2.62)         | 68.68 (2.45)         | 68.82 (2.36)         | <0.001   |
| Female                                           | 28.57 (24.14, 37.93) | 26.87 (23.08, 30.77) | 25.00 (21.21, 29.33) | 25.35 (22.08, 28.89) | <0.001   |
| Body mass index, mean (SD),<br>kg/m <sup>2</sup> | 23.34 (1.32)         | 23.71 (0.76)         | 23.73 (0.61)         | 23.73 (0.71)         | <0.001   |
| Hypertension                                     | 54.55 (41.67, 65.71) | 62.07 (53.95, 69.01) | 64.71 (53.13, 74.40) | 66.67 (56.10, 75.00) | <0.001   |
| Diabetes                                         | 27.86 (19.51, 35.56) | 28.22 (21.74, 35.21) | 28.85 (21.88, 33.33) | 30.17 (25.00, 36.26) | 0.047    |
| Smoker (current and ex-<br>smoker)               | 53.33 (38.46, 63.64) | 58.26 (50.00, 66.67) | 59.09 (50.00, 66.97) | 58.76 (50.00, 67.05) | <0.001   |
| Hemodialysis                                     | 0.00 (0.00, 4.44)    | 2.60 (0.00, 4.55)    | 1.65 (0.00, 3.14)    | 1.76 (0.00, 3.13)    | 0.002    |
| Charlson Score, mean (SD)                        | 2.16 (0.33)          | 2.11 (0.32)          | 2.05 (0.35)          | 2.05 (0.35)          | 0.002    |

|                        |                      |                      |                      |                      |        |
|------------------------|----------------------|----------------------|----------------------|----------------------|--------|
| Killip Class I         | 41.94 (22.22, 57.14) | 51.59 (33.33, 62.50) | 52.78 (38.26, 62.92) | 52.76 (36.46, 67.79) | <0.001 |
| II                     | 32.35 (21.21, 44.00) | 30.97 (17.65, 39.71) | 29.44 (20.67, 39.66) | 26.72 (18.42, 41.51) | 0.24   |
| III                    | 9.09 (5.00, 16.67)   | 7.32 (3.97, 11.16)   | 7.25 (3.90, 11.11)   | 6.67 (3.37, 10.00)   | 0.001  |
| IV                     | 12.20 (5.88, 19.35)  | 9.17 (5.56, 14.44)   | 9.43 (5.00, 14.89)   | 9.40 (5.43, 13.19)   | 0.031  |
| CAG                    | 87.50 (75.00, 94.44) | 94.12 (90.00, 96.15) | 95.24 (92.50, 97.39) | 96.34 (93.88, 97.98) | <0.001 |
| PCI                    | 75.00 (62.50, 84.38) | 85.05 (79.45, 89.13) | 87.69 (82.93, 91.96) | 90.54 (85.71, 93.63) | <0.001 |
| CABG                   | 0.00 (0.00, 3.13)    | 0.00 (0.00, 4.35)    | 1.18 (0.00, 3.23)    | 0.00 (0.00, 2.11)    | 0.005  |
| IABP                   | 8.00 (0.00, 16.46)   | 11.94 (6.78, 20.00)  | 13.04 (9.33, 19.13)  | 12.85 (7.69, 18.92)  | <0.001 |
| PCPS                   | 0.00 (0.00, 1.67)    | 1.00 (0.00, 2.80)    | 1.12 (0.00, 2.47)    | 1.01 (0.00, 2.38)    | <0.001 |
| Fibrinolysis           | 0.00 (0.00, 0.00)    | 0.00 (0.00, 0.43)    | 0.00 (0.00, 0.00)    | 0.00 (0.00, 1.01)    | 0.023  |
| Cardiac Rehabilitation | 71.26 (4.51)         | 69.19 (2.62)         | 68.68 (2.45)         | 68.82 (2.36)         | <0.001 |

Values presented are given as number (percentage) unless stated.

SD = standard deviation, IQR = interquartile range, CAG = coronary angiography, PCI = percutaneous coronary intervention, CABG = coronary arterial bypass grafting, IABP = intra-aortic balloon pump, PCPS = Percutaneous Cardio Pulmonary Support.

**Table S2. Baseline hospital characteristics per quantiles by prescription rate of  $\beta$ -Blocker on admission.**

|                                                  | Q1 (186 Hospitals)   | Q2 (185 Hospitals)   | Q3 (186 Hospitals)   | Q4 (187 Hospitals)   | P      |
|--------------------------------------------------|----------------------|----------------------|----------------------|----------------------|--------|
| Age in years, mean (SD)                          | 70.49 (4.06)         | 69.45 (3.33)         | 69.20 (2.75)         | 68.85 (2.63)         | <0.001 |
| Female                                           | 27.98 (22.22, 32.50) | 26.47 (22.36, 31.25) | 25.71 (22.50, 30.23) | 25.54 (22.22, 29.98) | 0.063  |
| Body mass index, mean (SD),<br>kg/m <sup>2</sup> | 23.48 (1.18)         | 23.63 (0.92)         | 23.67 (0.78)         | 23.72 (0.69)         | 0.074  |
| Hypertension                                     | 59.94 (45.45, 69.19) | 61.11 (50.78, 68.75) | 62.55 (51.61, 70.97) | 66.67 (54.06, 76.24) | 0.002  |
| Diabetes                                         | 28.88 (20.00, 35.56) | 28.75 (20.69, 34.78) | 29.23 (24.00, 35.90) | 28.57 (22.30, 33.14) | 0.33   |
| Smoker (current and ex-<br>smoker)               | 55.34 (45.68, 65.71) | 58.54 (49.21, 68.18) | 57.94 (47.22, 68.09) | 57.14 (48.98, 65.36) | 0.099  |
| Hemodialysis                                     | 0.93 (0.00, 3.33)    | 2.38 (0.00, 4.88)    | 2.32 (0.00, 4.00)    | 1.94 (0.00, 3.31)    | <0.001 |
| Charlson Score, mean (SD)                        | 2.05 (0.34)          | 2.09 (0.33)          | 2.11 (0.36)          | 2.11 (0.33)          | 0.32   |

|                        |                      |                      |                      |                      |        |
|------------------------|----------------------|----------------------|----------------------|----------------------|--------|
| Killip Class I         | 46.77 (30.00, 61.90) | 51.52 (34.69, 62.92) | 50.13 (33.94, 62.86) | 50.00 (34.29, 61.80) | 0.61   |
| II                     | 30.93 (20.00, 43.48) | 28.57 (18.03, 38.69) | 29.01 (19.05, 39.02) | 31.54 (20.71, 43.16) | 0.48   |
| III                    | 7.60 (3.94, 14.67)   | 8.04 (4.35, 12.50)   | 6.95 (3.90, 11.11)   | 7.49 (4.17, 10.70)   | 0.72   |
| IV                     | 9.54 (5.00, 15.56)   | 10.00 (5.67, 15.33)  | 10.53 (6.25, 14.95)  | 9.76 (4.94, 14.29)   | 0.40   |
| CAG                    | 93.65 (86.05, 97.37) | 93.75 (88.95, 96.89) | 95.03 (91.03, 96.97) | 94.94 (91.58, 97.07) | 0.036  |
| PCI                    | 85.09 (75.00, 90.85) | 85.37 (78.26, 90.16) | 87.10 (80.56, 91.18) | 86.42 (79.89, 90.96) | 0.11   |
| CABG                   | 0.00 (0.00, 1.18)    | 0.33 (0.00, 4.08)    | 0.00 (0.00, 3.66)    | 0.00 (0.00, 3.86)    | <0.001 |
| IABP                   | 8.63 (3.37, 16.67)   | 11.49 (6.45, 18.97)  | 11.99 (7.81, 19.86)  | 13.31 (8.46, 20.09)  | <0.001 |
| PCPS                   | 0.00 (0.00, 1.39)    | 0.86 (0.00, 2.80)    | 1.09 (0.00, 2.56)    | 1.35 (0.00, 2.58)    | <0.001 |
| Fibrinolysis           | 0.00 (0.00, 0.00)    | 0.00 (0.00, 0.00)    | 0.00 (0.00, 0.00)    | 0.00 (0.00, 1.31)    | 0.007  |
| Cardiac Rehabilitation | 33.33 (10.00, 78.57) | 56.86 (12.68, 80.97) | 48.68 (13.56, 80.41) | 60.77 (14.06, 84.15) | 0.089  |

Values presented are given as number (percentage) unless stated.

SD = standard deviation, IQR = interquartile range, CAG = coronary angiography, PCI = percutaneous coronary intervention, CABG = coronary arterial bypass grafting, IABP = intra-aortic balloon pump, PCPS = Percutaneous Cardio Pulmonary Support.

**Table S3. Baseline hospital characteristics per quantiles by prescription rate of aspirin on admission.**

|                                                  | Q1 (186 Hospitals)   | Q2 (185 Hospitals)   | Q3 (187 Hospitals)   | Q4 (183 Hospitals)   | P      |
|--------------------------------------------------|----------------------|----------------------|----------------------|----------------------|--------|
| Age in years, mean (SD)                          | 71.44 (4.26)         | 69.21 (2.64)         | 68.80 (2.21)         | 68.54 (2.86)         | <0.001 |
| Female                                           | 29.40 (24.39, 37.93) | 26.87 (22.86, 30.00) | 25.00 (21.88, 29.17) | 24.83 (21.05, 29.55) | <0.001 |
| Body mass index, mean (SD),<br>kg/m <sup>2</sup> | 23.21 (1.18)         | 23.81 (0.80)         | 23.71 (0.67)         | 23.76 (0.80)         | <0.001 |
| Hypertension                                     | 54.86 (40.00, 65.06) | 64.57 (54.29, 70.71) | 64.84 (55.00, 74.03) | 64.54 (53.13, 76.44) | <0.001 |
| Diabetes                                         | 27.27 (19.10, 34.21) | 29.29 (22.58, 35.81) | 28.75 (22.37, 33.54) | 29.29 (23.81, 35.80) | 0.038  |
| Smoker (current and ex-<br>smoker)               | 53.87 (40.74, 63.16) | 56.25 (47.83, 65.90) | 60.61 (50.00, 67.95) | 58.33 (50.94, 67.74) | <0.001 |
| Hemodialysis                                     | 2.11 (0.00, 5.56)    | 2.13 (0.00, 4.05)    | 1.92 (0.00, 3.25)    | 1.32 (0.00, 3.08)    | 0.083  |
| Charlson Score, mean (SD)                        | 2.17 (0.35)          | 2.11 (0.31)          | 2.06 (0.32)          | 2.03 (0.36)          | <0.001 |



|                        |                      |                      |                      |                      |        |
|------------------------|----------------------|----------------------|----------------------|----------------------|--------|
| Killip Class I         | 41.18 (25.81, 57.14) | 54.29 (37.17, 65.00) | 51.72 (36.96, 62.50) | 49.32 (32.14, 65.06) | <0.001 |
| II                     | 30.22 (20.00, 42.86) | 25.71 (19.64, 38.71) | 30.41 (18.31, 40.00) | 32.35 (20.67, 46.59) | 0.067  |
| III                    | 9.09 (5.21, 16.67)   | 6.78 (3.08, 11.43)   | 6.80 (4.17, 10.17)   | 7.14 (3.90, 11.11)   | 0.002  |
| IV                     | 12.86 (6.25, 20.37)  | 10.00 (5.83, 14.29)  | 9.52 (6.31, 14.91)   | 8.11 (4.32, 13.24)   | <0.001 |
| CAG                    | 90.62 (78.67, 94.48) | 94.68 (90.00, 96.83) | 94.90 (92.19, 97.28) | 96.12 (93.44, 97.80) | <0.001 |
| PCI                    | 78.50 (63.64, 85.71) | 85.51 (79.41, 89.74) | 87.72 (82.14, 91.67) | 89.19 (84.62, 92.86) | <0.001 |
| CABG                   | 0.00 (0.00, 2.17)    | 0.00 (0.00, 3.33)    | 0.74 (0.00, 3.60)    | 0.00 (0.00, 2.63)    | 0.006  |
| IABP                   | 9.86 (2.50, 19.51)   | 11.76 (7.32, 19.75)  | 13.39 (8.00, 18.45)  | 11.11 (6.58, 18.18)  | 0.021  |
| PCPS                   | 0.00 (0.00, 2.56)    | 1.06 (0.00, 3.28)    | 1.19 (0.00, 2.13)    | 0.00 (0.00, 1.94)    | 0.014  |
| Fibrinolysis           | 0.00 (0.00, 0.00)    | 0.00 (0.00, 0.83)    | 0.00 (0.00, 0.73)    | 0.00 (0.00, 0.52)    | 0.16   |
| Cardiac Rehabilitation | 30.66 (10.96, 67.77) | 56.51 (16.67, 79.10) | 56.86 (11.02, 82.22) | 57.55 (12.00, 87.84) | <0.001 |

Values presented are given as number (percentage) unless stated.

SD = standard deviation, IQR = interquartile range, CAG = coronary angiography, PCI = percutaneous coronary intervention, CABG = coronary arterial bypass grafting, IABP = intra-aortic balloon pump, PCPS = Percutaneous Cardio Pulmonary Support.

**Table S4. Baseline hospital characteristics per quantiles by prescription rate of  $\beta$ -Blocker on discharge.**

|                                                  | Q1 (186 Hospitals)    | Q2 (185 Hospitals)   | Q3 (185 Hospitals)   | Q4 (185 Hospitals)   | P      |
|--------------------------------------------------|-----------------------|----------------------|----------------------|----------------------|--------|
| Age in years, mean (SD)                          | 70.89 (4.43)          | 69.73 (2.90)         | 68.75 (2.41)         | 68.62 (2.51)         | <0.001 |
| Female                                           | 28.03 (23.44, 34.62)  | 27.45 (22.73, 31.25) | 25.26 (22.12, 28.87) | 25 (21.66, 30.00)    | <0.001 |
| Body mass index, mean (SD),<br>kg/m <sup>2</sup> | 23.44 (1.24)          | 23.54 (0.81)         | 23.80 (0.67)         | 23.72 (0.79)         | <0.001 |
| Hypertension                                     | 55.04 (40.00 , 64.52) | 62.07 (51.03, 70.73) | 65.73 (54.37, 75.00) | 67.48 (56.63, 76.44) | <0.001 |
| Diabetes                                         | 28.03 (19.64, 35.35)  | 28.57 (22.22, 34.00) | 29.29 (23.53, 35.56) | 29.03 (22.86, 34.78) | 0.46   |
| Smoker (current and ex-<br>smoker)               | 54.93 (42.31, 65.22)  | 56.90 (46.30, 65.71) | 61.11 (52.11, 68.42) | 57.14 (48.04, 65.20) | <0.001 |
| Hemodialysis                                     | 0 (0, 3.33)           | 2.30 (0, 4.13)       | 2.24 (0, 4.26)       | 1.96 (0, 3.33)       | 0.002  |
| Charlson Score, mean (SD)                        | 2.07 (0.39)           | 2.09 (0.32)          | 2.11 (0.36)          | 2.09 (0.29)          | 0.72   |

|                        |                      |                      |                      |                      |        |
|------------------------|----------------------|----------------------|----------------------|----------------------|--------|
| Killip Class I         | 47.06 (30.77, 60.98) | 50 (32.08, 62.50)    | 52.94 (35.16, 64.71) | 48.94 (33.33, 61.40) | 0.24   |
| II                     | 30.93 (20.00, 42.37) | 28.57 (19.10, 39.47) | 29.46 (19.00, 41.03) | 30.65 (20.39, 44.44) | 0.53   |
| III                    | 8.52 (4.17, 15.38)   | 7.69 (3.95, 11.48)   | 6.90 (3.41, 10.37)   | 7.45 (4.42, 10.87)   | 0.19   |
| IV                     | 10.00 (4.76, 15.11)  | 10.23 (6.25, 14.71)  | 9.09 (5.56, 15.19)   | 10 (5.06, 14.48)     | 0.68   |
| CAG                    | 92.27 (82.76, 96.77) | 94.12 (89.02, 96.88) | 94.55 (91.07, 96.72) | 95.24 (92.68, 97.22) | <0.001 |
| PCI                    | 84.67 (69.17, 90.24) | 85.04 (78.05, 89.66) | 86.54 (81.25, 91.01) | 87.69 (81.78, 91.67) | <0.001 |
| CABG                   | 0 (0, 0.08)          | 0 (0, 3.13)          | 1 (0, 4.08)          | 1.22 (0, 3.97)       | <0.001 |
| IABP                   | 7.00 (0, 14.44)      | 11.48 (6.78, 18.92)  | 12.31 (8.04, 21.36)  | 15.38 (9.68, 20.51)  | <0.001 |
| PCPS                   | 0 (0, 1.19)          | 0 (0, 2.36)          | 1.35 (0, 2.74)       | 1.37 (0, 2.87)       | <0.001 |
| Fibrinolysis           | 0 (0, 0)             | 0 (0, .68)           | 0 (0, 0.75)          | 0 (0, 0.66)          | 0.26   |
| Cardiac Rehabilitation | 25.25 (6.67, 68.57)  | 48.78 (13.41, 78.95) | 48.57 (13.38, 81.00) | 68.18 (20.00, 86.90) | <0.001 |

Values presented are given as number (percentage) unless stated.

SD = standard deviation, IQR = interquartile range, CAG = coronary angiography, PCI = percutaneous coronary intervention, CABG = coronary arterial bypass grafting, IABP = intra-aortic balloon pump, PCPS = Percutaneous Cardio Pulmonary Support.

**Table S5. Baseline hospital characteristics per quantiles by prescription rate of ACEI/ARB on discharge.**

|                                                  | Q1 (187 Hospitals)   | Q2 (184 Hospitals)   | Q3 (186 Hospitals)   | Q4 (184 Hospitals)   | <b>P</b> |
|--------------------------------------------------|----------------------|----------------------|----------------------|----------------------|----------|
| Age in years, mean (SD)                          | 71.15 (4.28)         | 69.49 (3.00)         | 68.83 (2.65)         | 68.49 (2.22)         | <0.001   |
| Female                                           | 28.57 (22.73, 36.00) | 26.54 (22.22, 30.87) | 26.67 (22.63, 30.37) | 25.00 (22.06, 28.57) | <0.001   |
| Body mass index, mean (SD),<br>kg/m <sup>2</sup> | 23.35 (1.19)         | 23.61 (0.87)         | 23.69 (0.72)         | 23.86 (0.70)         | <0.001   |
| Hypertension                                     | 51.61 (40.00, 63.16) | 61.14 (51.88, 68.61) | 65.17 (55.17, 73.68) | 69.14 (59.03, 78.21) | <0.001   |
| Diabetes                                         | 27.27 (19.64, 33.54) | 30.74 (22.80, 37.19) | 28.85 (21.88, 34.48) | 28.41 (23.29, 33.34) | 0.026    |
| Smoker (current and ex-<br>smoker)               | 54.17 (40.00, 63.89) | 57.03 (46.39, 65.52) | 59.94 (50.00, 68.00) | 59.30 (51.93, 67.81) | <0.001   |
| Hemodialysis                                     | 0.00 (0.00, 4.26)    | 2.15 (0.00, 4.24)    | 2.35 (0.67, 3.70)    | 1.64 (0.00, 3.51)    | 0.032    |
| Charlson Score, mean (SD)                        | 2.11 (0.38)          | 2.09 (0.36)          | 2.12 (0.33)          | 2.05 (0.29)          | 0.13     |

|                        |                      |                      |                      |                      |        |
|------------------------|----------------------|----------------------|----------------------|----------------------|--------|
| Killip Class I         | 46.67 (30.00, 60.00) | 48.96 (33.70, 61.72) | 51.04 (33.94, 63.31) | 51.91 (35.26, 64.85) | 0.14   |
| II                     | 32.11 (20.00, 42.31) | 29.41 (19.48, 39.74) | 27.59 (20.41, 40.63) | 29.66 (19.42, 42.89) | 0.78   |
| III                    | 8.22 (3.66, 14.67)   | 7.54 (4.32, 13.45)   | 7.16 (3.85, 10.34)   | 7.43 (4.06, 10.62)   | 0.33   |
| IV                     | 10.00 (4.88, 16.22)  | 10.65 (5.92, 15.89)  | 10.26 (5.56, 15.20)  | 8.70 (5.32, 13.43)   | 0.16   |
| CAG                    | 91.43 (76.92, 96.08) | 94.86 (90.08, 97.01) | 93.98 (90.16, 96.55) | 95.68 (93.19, 97.33) | <0.001 |
| PCI                    | 81.71 (62.50, 87.80) | 86.52 (80.15, 90.88) | 85.71 (79.79, 90.00) | 88.81 (82.31, 92.59) | <0.001 |
| CABG                   | 0.00 (0.00, 0.00)    | 0.00 (0.00, 3.43)    | 0.84 (0.00, 3.45)    | 1.22 (0.00, 3.92)    | <0.001 |
| IABP                   | 6.78 (0.00, 15.00)   | 12.67 (8.00, 21.21)  | 12.50 (8.54, 19.35)  | 13.75 (8.02, 19.66)  | <0.001 |
| PCPS                   | 0.00 (0.00, 1.27)    | 1.03 (0.00, 3.10)    | 1.38 (0.00, 2.56)    | 1.06 (0.00, 2.17)    | <0.001 |
| Fibrinolysis           | 0.00 (0.00, 0.00)    | 0.00 (0.00, 0.68)    | 0.00 (0.00, 0.52)    | 0.00 (0.00, 0.70)    | 0.40   |
| Cardiac Rehabilitation | 35.05 (10.96, 70.83) | 59.95 (14.15, 81.77) | 41.41 (12.43, 80.77) | 60.75 (12.59, 85.63) | 0.020  |

Values presented are given as number (percentage) unless stated.

SD = standard deviation, IQR = interquartile range, CAG = coronary angiography, PCI = percutaneous coronary intervention, CABG = coronary arterial bypass grafting, IABP = intra-aortic balloon pump, PCPS = Percutaneous Cardio Pulmonary Support.



**Table S6. Baseline hospital characteristics per quantiles by prescription rate of statin on discharge.**

|                                                  | Q1 (188 Hospitals)   | Q2 (183 Hospitals)   | Q3 (185 Hospitals)   | Q4 (185 Hospitals)   | P      |
|--------------------------------------------------|----------------------|----------------------|----------------------|----------------------|--------|
| Age in years, mean (SD)                          | 71.45 (4.39)         | 69.50 (2.51)         | 69.00 (2.34)         | 68.01 (2.44)         | <0.001 |
| Female                                           | 28.57 (24.39, 36.60) | 27.30 (22.73, 30.77) | 25.68 (22.05, 30.19) | 24.52 (21.03, 28.44) | <0.001 |
| Body mass index, mean (SD),<br>kg/m <sup>2</sup> | 23.26 (1.20)         | 23.67 (0.71)         | 23.72 (0.74)         | 23.86 (0.79)         | <0.001 |
| Hypertension                                     | 53.85 (40.00, 63.97) | 62.80 (51.61, 71.26) | 64.84 (56.82, 71.43) | 67.97 (54.55, 77.78) | <0.001 |
| Diabetes                                         | 27.27 (19.84, 35.34) | 29.55 (22.22, 35.21) | 29.29 (23.33, 35.71) | 28.52 (22.60, 33.79) | 0.40   |
| Smoker (current and ex-<br>smoker)               | 53.84 (41.62, 63.76) | 57.14 (47.33, 65.79) | 59.34 (50.53, 66.67) | 60.00 (50.00, 67.95) | 0.002  |
| Hemodialysis                                     | 1.33 (0.00, 5.32)    | 2.27 (0.00, 4.04)    | 1.67 (0.00, 3.33)    | 1.95 (0.00, 3.08)    | 0.60   |
| Charlson Score, mean (SD)                        | 2.13 (0.38)          | 2.12 (0.32)          | 2.06 (0.31)          | 2.06 (0.34)          | 0.086  |

|                        |                      |                      |                      |                      |        |
|------------------------|----------------------|----------------------|----------------------|----------------------|--------|
| Killip Class I         | 42.86 (27.27, 57.79) | 50.00 (34.15, 62.30) | 50.68 (36.76, 63.36) | 52.94 (35.38, 66.67) | <0.001 |
| II                     | 32.42 (21.40, 44.22) | 28.89 (17.78, 40.00) | 29.13 (20.41, 40.38) | 29.44 (18.99, 40.00) | 0.18   |
| III                    | 8.99 (4.35, 16.11)   | 8.06 (4.26, 12.23)   | 7.14 (3.23, 10.75)   | 6.58 (4.29, 9.72)    | 0.009  |
| IV                     | 10.60 (5.04, 17.52)  | 10.31 (6.41, 14.71)  | 10.00 (6.03, 14.29)  | 8.75 (4.79, 13.85)   | 0.091  |
| CAG                    | 90.91 (78.29, 96.43) | 93.83 (88.71, 96.55) | 94.74 (92.11, 97.06) | 95.83 (92.89, 97.44) | <0.001 |
| PCI                    | 80.51 (63.64, 87.66) | 85.94 (78.26, 90.14) | 87.25 (81.71, 91.78) | 87.72 (83.94, 92.31) | <0.001 |
| CABG                   | 0.00 (0.00, 1.36)    | 0.00 (0.00, 2.94)    | 1.05 (0.00, 4.11)    | 0.66 (0.00, 3.36)    | <0.001 |
| IABP                   | 8.65 (0.00, 16.29)   | 12.41 (7.84, 20.41)  | 12.46 (7.76, 20.41)  | 12.40 (7.89, 18.25)  | <0.001 |
| PCPS                   | 0.00 (0.00, 1.80)    | 1.04 (0.00, 2.90)    | 1.22 (0.00, 2.74)    | 0.53 (0.00, 2.00)    | <0.001 |
| Fibrinolysis           | 0.00 (0.00, 0.00)    | 0.00 (0.00, 0.26)    | 0.00 (0.00, 0.83)    | 0.00 (0.00, 0.69)    | 0.035  |
| Cardiac Rehabilitation | 30.22 (10.54, 71.13) | 48.57 (13.38, 76.92) | 66.67 (16.87, 85.37) | 50.00 (10.77, 85.19) | <0.001 |

Values presented are given as number (percentage) unless stated.

SD = standard deviation, IQR = interquartile range, CAG = coronary angiography, PCI = percutaneous coronary intervention, CABG = coronary arterial bypass grafting, IABP = intra-aortic balloon pump, PCPS = Percutaneous Cardio Pulmonary Support.

**Table S7. Correlation of hospital prescription rate of guideline-directed medications.**

|                              | <b>Aspirin<br/>(admission)</b> | <b>β-blocker<br/>(admission)</b> | <b>Aspirin<br/>(discharge)</b> | <b>β-blocker<br/>(discharge)</b> | <b>ACE-I/ARB<br/>(discharge)</b> | <b>Statin<br/>(discharge)</b> |
|------------------------------|--------------------------------|----------------------------------|--------------------------------|----------------------------------|----------------------------------|-------------------------------|
| <b>Aspirin (admission)</b>   | 1.00                           |                                  |                                |                                  |                                  |                               |
| <b>β-blocker(admission)</b>  | 0.15*                          | 1.00                             |                                |                                  |                                  |                               |
| <b>Aspirin (discharge)</b>   | 0.37*                          | 0.09*                            | 1.00                           |                                  |                                  |                               |
| <b>β-blocker (discharge)</b> | 0.13*                          | 0.43*                            | 0.34*                          | 1.00                             |                                  |                               |
| <b>ACE-I/ARB (discharge)</b> | 0.2*                           | 0.14*                            | 0.43*                          | 0.33*                            | 1.00                             |                               |
| <b>Statin (discharge)</b>    | 0.26*                          | 0.13*                            | 0.54*                          | 0.31*                            | 0.40*                            | 1.00                          |

\* Indicates p<0.05

ACEI, angiotensin-converting enzyme inhibitor; ARB, angiotensin receptor blocker

**Table S8. Incidence Rate Ratio for In-hospital Mortality According to the Quantile of Each Guideline-directed Medication by mixed Poisson regression model.**

|                                                                                                             | Q1   | Q2               |        | Q3               |        | Q4               |        | P for  |
|-------------------------------------------------------------------------------------------------------------|------|------------------|--------|------------------|--------|------------------|--------|--------|
|                                                                                                             | IRR  | IRR (95% CI)     | P      | IRR (95% CI)     | P      | IRR (95% CI)     | P      | trend  |
| <b>Multivariate analysis model 1</b> (Adjusted for age, sex, Charlson's comorbidity index and Killip class) |      |                  |        |                  |        |                  |        |        |
| <b>Aspirin (admission)</b>                                                                                  | 1.00 | 0.89 (0.80-0.99) | 0.039  | 0.77 (0.68-0.86) | <0.001 | 0.74 (0.66-0.83) | <0.001 | <0.001 |
| <b>β-blocker(admission)</b>                                                                                 | 1.00 | 1.00 (0.90-1.11) | 0.999  | 0.92 (0.83-1.03) | 0.156  | 0.86 (0.77-0.97) | <0.001 | 0.003  |
| <b>Aspirin (discharge)</b>                                                                                  | 1.00 | 0.76 (0.68-0.84) | <0.001 | 0.70 (0.63-0.77) | <0.001 | 0.53 (0.47-0.59) | <0.001 | <0.001 |
| <b>β-blocker (discharge)</b>                                                                                | 1.00 | 0.87 (0.78-0.97) | 0.011  | 0.81 (0.73-0.91) | <0.001 | 0.80 (0.72-0.90) | <0.001 | <0.001 |
| <b>ACE-I/ARB (discharge)</b>                                                                                | 1.00 | 0.89 (0.80,1.00) | 0.042  | 0.82 (0.73-0.92) | 0.001  | 0.74 (0.66-0.83) | <0.001 | <0.001 |
| <b>Statin (discharge)</b>                                                                                   | 1.00 | 0.88 (0.79-0.98) | 0.020  | 0.79 (0.71-0.88) | <0.001 | 0.68 (0.60-0.76) | <0.001 | <0.001 |

| <b>Multivariate analysis model 2</b> (Adjusted for age, sex, Charlson's comorbidity index, Killip class, hospital bed number, number of patients of AMI and number of cardiologists) |      |                  |        |                  |        |                  |        |        |
|--------------------------------------------------------------------------------------------------------------------------------------------------------------------------------------|------|------------------|--------|------------------|--------|------------------|--------|--------|
| <b>Aspirin (admission)</b>                                                                                                                                                           | 1.00 | 0.91 (0.82-1.02) | 0.115  | 0.79 (0.71-0.89) | <0.001 | 0.77 (0.69-0.87) | <0.001 | <0.001 |
| <b>β-blocker(admission)</b>                                                                                                                                                          | 1.00 | 1.03 (0.93-1.14) | 0.595  | 0.92 (0.82-1.02) | 0.128  | 0.88 (0.78-0.98) | 0.020  | 0.002  |
| <b>Aspirin (discharge)</b>                                                                                                                                                           | 1.00 | 0.79 (0.71-0.87) | <0.001 | 0.71 (0.64-0.78) | <0.001 | 0.54 (0.49-0.61) | <0.001 | <0.001 |
| <b>β-blocker (discharge)</b>                                                                                                                                                         | 1.00 | 0.85 (0.76-0.95) | 0.003  | 0.82 (0.73-0.91) | <0.001 | 0.80 (0.72-0.89) | <0.001 | <0.001 |
| <b>ACE-I/ARB (discharge)</b>                                                                                                                                                         | 1.00 | 0.88 (0.79-0.98) | 0.023  | 0.82 (0.74-0.92) | 0.001  | 0.73 (0.65-0.82) | <0.001 | <0.001 |
| <b>Statin (discharge)</b>                                                                                                                                                            | 1.00 | 0.88 (0.79-0.98) | 0.021  | 0.80 (0.72-0.90) | <0.001 | 0.67 (0.62-0.76) | <0.001 | <0.001 |

IRR = incidence rate ratio.

ACEI, angiotensin-converting enzyme inhibitor; ARB, angiotensin receptor blocker; AMI, acute myocardial infarction

**Table S9. Hospital characteristics according to composite prescription score (CPS).**

|                                                  | CPS 6-10<br>(188 Hospitals) | CPS 12-15<br>(195 Hospitals) | CPS 16-19<br>(217 Hospitals) | CPS 20-24<br>(141 Hospitals) | <b>P</b> |
|--------------------------------------------------|-----------------------------|------------------------------|------------------------------|------------------------------|----------|
| Age in years, mean (SD)                          | 71.54 (4.32)                | 69.30 (2.69)                 | 68.79 (2.47)                 | 68.15 (2.15)                 | <0.001   |
| Female                                           | 29.29 (24.32, 36.60)        | 26.83 (22.73, 31.03)         | 25.84 (22.08, 29.63)         | 24.53 (21.21, 27.01)         | <0.001   |
| Body mass index, mean (SD),<br>kg/m <sup>2</sup> | 23.27 (1.22)                | 23.73 (0.79)                 | 23.72 (0.80)                 | 23.81 (0.55)                 | <0.001   |
| Hypertension                                     | 53.14 (40.00, 63.82)        | 61.54 (53.33, 67.78)         | 65.38 (54.90, 73.91)         | 69.62 (58.97, 78.64)         | <0.001   |
| Diabetes                                         | 27.68 (19.60, 34.81)        | 28.57 (21.26, 36.17)         | 29.58 (22.64, 34.72)         | 28.57 (23.53, 33.33)         | 0.45     |
| Smoker (current and ex-<br>smoker)               | 52.92 (40.00, 61.32)        | 58.52 (48.55, 67.05)         | 60.19 (51.18, 68.64)         | 57.92 (49.32, 65.90)         | <0.001   |
| Hemodialysis                                     | 0.31 (0.00, 4.52)           | 2.44 (0.00, 4.48)            | 1.96 (0.00, 3.39)            | 1.65 (0.00, 3.03)            | 0.029    |

|                           |                      |                      |                      |                      |        |
|---------------------------|----------------------|----------------------|----------------------|----------------------|--------|
| Charlson Score, mean (SD) | 2.14 (0.35)          | 2.08 (0.34)          | 2.09 (0.36)          | 2.05 (0.30)          | 0.13   |
| Killip Class I            | 43.66 (28.39, 60.00) | 48.78 (34.48, 60.98) | 53.13 (34.07, 65.00) | 52.13 (37.87, 65.32) | 0.011  |
| II                        | 30.66 (20.00, 42.62) | 29.51 (19.32, 39.71) | 30.34 (19.74, 44.44) | 28.00 (20.00, 36.84) | 0.70   |
| III                       | 8.75 (4.61, 15.87)   | 8.16 (4.30, 13.33)   | 6.51 (3.16, 10.23)   | 7.25 (4.42, 10.00)   | 0.003  |
| IV                        | 11.00 (5.56, 16.67)  | 11.02 (6.52, 17.07)  | 8.74 (5.00, 12.37)   | 9.52 (5.00, 13.95)   | 0.003  |
| CAG                       | 90.16 (77.00, 95.49) | 93.67 (88.46, 96.67) | 95.24 (92.59, 97.44) | 96.10 (93.99, 97.40) | <0.001 |
| PCI                       | 78.20 (62.41, 87.37) | 85.37 (79.19, 90.52) | 87.40 (82.14, 91.72) | 89.23 (85.71, 92.81) | <0.001 |
| CABG                      | 0.00 (0.00, 0.80)    | 0.00 (0.00, 3.23)    | 0.52 (0.00, 4.11)    | 1.22 (0.00, 2.78)    | <0.001 |
| IABP                      | 6.67 (0.00, 14.50)   | 12.41 (7.69, 21.36)  | 11.90 (8.00, 19.35)  | 14.44 (9.52, 19.15)  | <0.001 |
| PCPS                      | 0.00 (0.00, 1.67)    | 1.00 (0.00, 2.90)    | 1.10 (0.00, 2.47)    | 1.30 (0.00, 2.27)    | <0.001 |
| Fibrinolysis              | 0.00 (0.00, 0.00)    | 0.00 (0.00, 0.66)    | 0.00 (0.00, 0.77)    | 0.00 (0.00, 0.78)    | 0.056  |
| Cardiac Rehabilitation    | 32.58 (11.75, 69.45) | 45.00 (11.02, 80.00) | 60.56 (15.33, 83.12) | 65.91 (13.13, 87.18) | <0.001 |



|                       |                      |                      |                      |                      |        |
|-----------------------|----------------------|----------------------|----------------------|----------------------|--------|
| Aspirin (admission)   | 77.95 (69.74, 84.57) | 86.21 (81.82, 89.47) | 88.89 (85.37, 91.84) | 92.31 (89.94, 94.17) | <0.001 |
| β-blocker(admission)  | 10.34 (5.04, 20.00)  | 18.54 (10.08, 29.63) | 29.01 (18.67, 40.24) | 45.68 (32.56, 58.14) | <0.001 |
| Aspirin (discharge)   | 71.08 (62.87, 76.23) | 79.17 (75.00, 83.33) | 82.44 (78.57, 86.21) | 85.90 (82.26, 88.89) | <0.001 |
| β-blocker (discharge) | 27.72 (16.52, 40.56) | 44.22 (34.48, 55.24) | 58.33 (50.00, 64.56) | 68.99 (61.54, 75.13) | <0.001 |
| ACE-I/ARB (discharge) | 39.23 (27.27, 49.83) | 58.21 (50.62, 64.29) | 66.13 (59.09, 71.62) | 74.15 (66.67, 79.25) | <0.001 |
| Statin (discharge)    | 50.00 (39.24, 60.62) | 65.31 (58.02, 71.00) | 73.23 (67.95, 77.78) | 79.08 (74.77, 82.72) | <0.001 |

Values presented are given as number (percentage) unless stated.

SD = standard deviation, IQR = interquartile range, CAG = coronary angiography, PCI = percutaneous coronary intervention, CABG = coronary arterial bypass grafting, IABP = intra-aortic balloon pump, PCPS = Percutaneous Cardio Pulmonary Support.

**Figure S1. Study Flow Chart.**

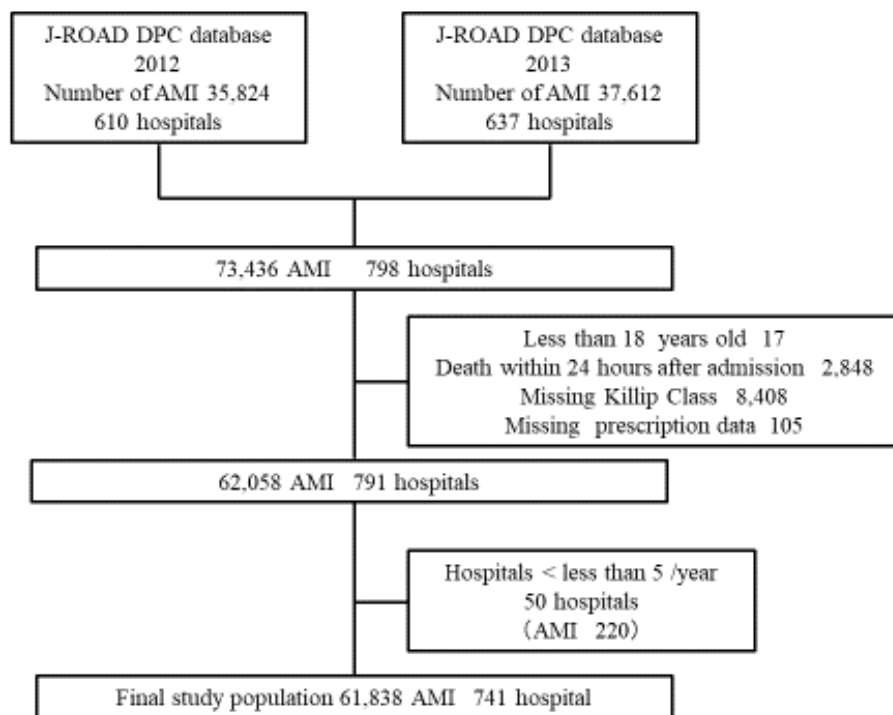

JROAD, Japanese Registry of All Cardiac and Vascular Diseases; DPC, Diagnostic Procedure Combination.
